# Supplementary material
Source: MDPI journal article supplement (https://www.mdpi.com/2077-0472/11/5/446)
Supplement: s1 [file s1]

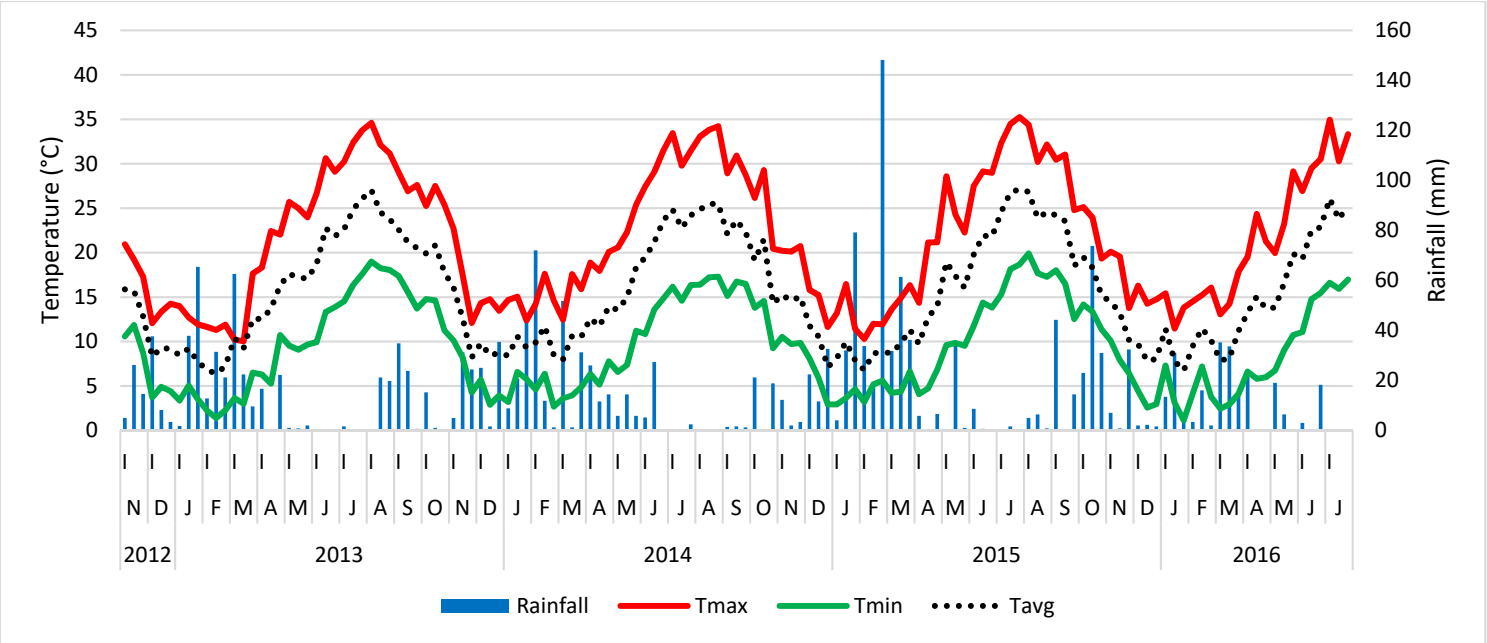

**Figure S1.** Ten-day values of rainfall (mm) and minimum, maximum, and average temperatures (°C) recorded at Sparacia (Cammarata, AG, Sicily) from November 2012 to July 2016.

**Table S1.** Main characteristics of the soil used for the trial at Sparacia (Cammarata, AG, Sicily).

| Soil characteristics                          | Measured values |
|-----------------------------------------------|-----------------|
| Clay (%)                                      | 37.1            |
| Silt (%)                                      | 25.1            |
| Sand (%)                                      | 37.9            |
| pH                                            | 8.67            |
| EC (mS)                                       | 0.388           |
| Total CaCO <sub>3</sub> (%)                   | 24.5            |
| Active CaCO <sub>3</sub> (%)                  | 3.25            |
| Organic matter (‰)                            | 14.4            |
| Total N (‰)                                   | 0.98            |
| Assimilable P <sub>2</sub> O <sub>5</sub> (‰) | 0.054           |
| Exchangeable K <sub>2</sub> O (‰)             | 0.28            |
| Cl <sup>-</sup> (‰)                           | 0.09            |
